# Supplementary material for: Graphene decorated with MoS2 nanosheets: a synergetic energy storage composite electrode for supercapacitor applications
Source: Royal Society of Chemistry journal article supplement (doi:10.1039/c5dt04832j), 2015-12-21
Supplement: c5dt04832j1.pdf [file c5dt04832j1.pdf]

## Graphene Decorated with MoS<sub>2</sub> Nanosheets: Synergetic Energy Storage composite electrode for Supercapacitor Applications

R. Thangappan<sup>a</sup>, S. Kalaiselvam<sup>b</sup>, A. Elayaperumal<sup>c</sup>, R. Jayavel<sup>a\*</sup>, M. Arivanandhan<sup>a</sup>,  
R. Karthikeyan<sup>e</sup> and Y. Hayakawa<sup>d, e</sup>

<sup>a</sup>Centre for Nanoscience and Technology, Anna University, Chennai -25, Tamil Nadu, India

<sup>b</sup>Department of Applied Science and Technology, Anna University, Chennai -25, Tamil Nadu, India

<sup>c</sup>Department of Mechanical Engineering, Anna University, Chennai-25, Tamil Nadu, India

<sup>d</sup>Research Institute of Electronics, Shizuoka University, 3-5-1 Johoku, Naka-ku, Hamamatsu, Shizuoka – 432-8011, Japan

<sup>e</sup>Graduate School of Science and Technology, Shizuoka University, 3-5-1, Johoku, Naka-ku, Hamamatsu, Shizuoka 432-8011, Japan

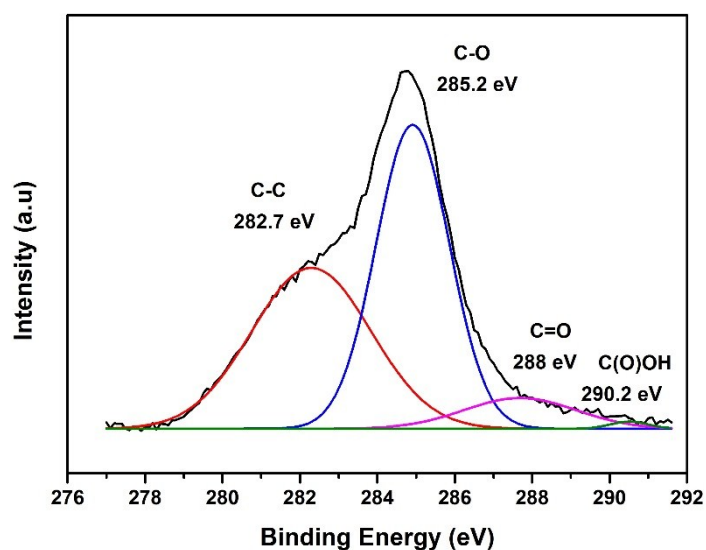

**Figure S1.** High-resolution C1s spectra of GO.

The high-resolution C1s XPS spectrum of the GO sheets showed a sharp peak at 282.7 eV that corresponded to C-C bonds of carbon atoms in a conjugated honey-comb lattice. Peaks at 285.2, 288 and 290.2 eV could be attributed to different C-O bonding configurations due to the harsh oxidation and destruction of the sp<sup>2</sup> atomic structure of graphite [1].

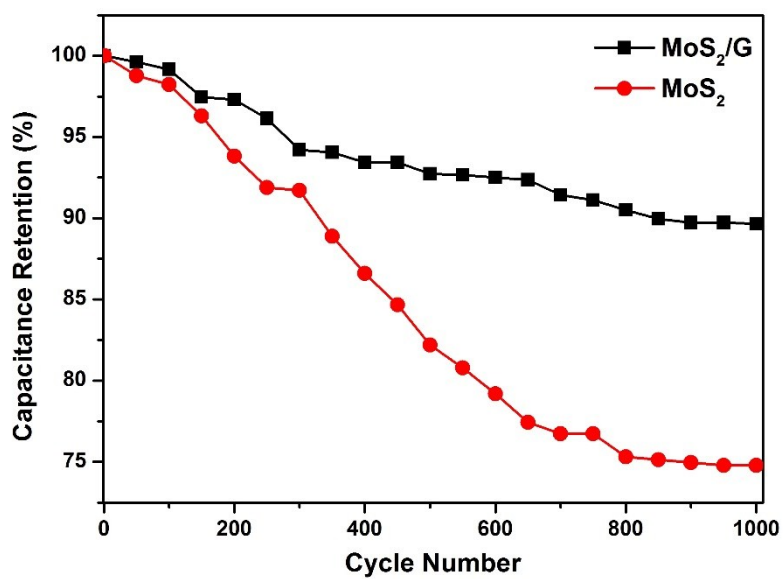

Figure S2.

Capacitive retention of MoS<sub>2</sub>/G composite and pure MoS<sub>2</sub>.

#### Reference

- [1] Surajit Some, Seok-Man Ho, Pooja Dua, Eunhee Hwang, Young Hun Shin, HeeJoun Yoo, Jong-Sun Kang, Dong-ki Lee, and Hyoyoung Lee, ACS Nano 6, 7151–7161(2012).
